# Supplementary material for: Black Soldier Fly Larvae Grown on Hemp Fiber: Nutritional Composition and Production of Potential Bioactive Peptides
Source: MDPI journal article supplement (doi:10.3390/macromol4010007), 2024-03-16
Supplement: s1 [file s1]

**Table S1.**

Amino acid score of BSFL calculated in comparison to the FAO/WHO standard for human nutrition [25].

| Essential Amino Acid | Amino Acid Score |
|----------------------|------------------|
| Thr                  | 1.6              |
| Val                  | 1.6              |
| Lys                  | 1.6              |
| Ile                  | 1.0              |
| Leu                  | 0.7              |
| Met                  | 3.0              |
| His                  | 1.4              |
| Phe + Tyr            | 1.5              |

**Table S2.**

List of peptides identified in 3 hours hydrolysate (A) and in 15 hours hydrolysate (B):

(A)

| Peptide             | -10lgP | Mass    | Length | ppm  | Area Sample | Accession  | Protein              | Function                          | Sub-function            |
|---------------------|--------|---------|--------|------|-------------|------------|----------------------|-----------------------------------|-------------------------|
| GPPGPPGPPGPPGPKFPL  | 54,46  | 1815,97 | 20     | -0,8 | 5,06E+06    | A0A7R8UM91 | Hypothetical protein | structural constituent of cuticle |                         |
| GPGGPGGPKGGGGPGPF   | 52,86  | 1445,71 | 18     | -1,2 | 5,28E+06    | A0A7R8UM91 | Hypothetical protein | structural constituent of cuticle |                         |
| GPPGPPGPPGLPGKFGST  | 61,41  | 1712,89 | 19     | -0,7 | 5,37E+06    | A0A7R8UM91 | Hypothetical protein | structural constituent of cuticle |                         |
| NIYPVPDPRFPFL       | 29,59  | 1573,83 | 13     | 1,4  | 1,50E+05    | A0A1J1IKW3 | CLUMA_CG013678       | Enzyme                            | oxidoreductase activity |
| ISPPPLVSIPIVGGIL    | 39,16  | 1554,94 | 16     | -1,2 | 2,80E+05    | A0A7R8YVB4 | Hypothetical protein | calcium ion binding               |                         |
| GNIYPVPDPRFPFL      | 45,09  | 1630,85 | 14     | 1    | 4,94E+05    | A0A1J1IKW3 | CLUMA_CG013677       | Enzyme                            | oxidoreductase activity |
| IISPPPLVSIPIVGGIL   | 48,36  | 1668,02 | 17     | 0,2  | 4,28E+06    | A0A7R8YVB4 | Hypothetical protein | calcium ion binding               |                         |
| GKPGPAGPPGPPGPL     | 45,51  | 1294,70 | 15     | 0,1  | 8,83E+06    | A0A7R8UM91 | Hypothetical protein | structural constituent of cuticle |                         |
| GFPFDRPIDL          | 31,14  | 1175,60 | 10     | -0,9 | 4,81E+06    | A0A7R8YSW8 | Hypothetical protein | Hemocyanin                        |                         |
| SRPSIGLPGSPGLPGL    | 43,55  | 1503,84 | 16     | 0,1  | 5,02E+06    | A0A7R8UM91 | Hypothetical protein | structural constituent of cuticle |                         |
| GAHLPIPPPIPDYILR    | 54,87  | 1768,00 | 16     | 0    | 1,29E+07    | A0A7R8YNH0 | Hypothetical protein | structural constituent of cuticle |                         |
| SRPSLGLPGSPGSPGLPGL | 47,56  | 1744,95 | 19     | -1,9 | 2,54E+06    | A0A7R8UM91 | Hypothetical protein | structural constituent of cuticle |                         |
| PPPPQPIPDYIVR       | 47,72  | 1487,81 | 13     | -2,1 | 6,46E+06    | A0A7R8V147 | Hypothetical protein | structural constituent of cuticle |                         |
| GAHLPIPPPIPDYIL     | 45,6   | 1611,90 | 15     | -0,4 | 2,35E+06    | A0A7R8YNH0 | Hypothetical protein | structural constituent of cuticle |                         |
| KNPFDEPGKGNL        | 34,76  | 1411,71 | 13     | -1,7 | 1,74E+06    | A0A7R8Z362 | Hypothetical protein | ATP binding                       |                         |
| GSRFFDDLPL          | 29,42  | 1165,58 | 10     | -1,5 | 2,55E+07    | A0A7R8UJCO | Hypothetical protein | Hemocyanin                        |                         |

|                          |       |         |    |      |          |            |                                |                                   |                              |
|--------------------------|-------|---------|----|------|----------|------------|--------------------------------|-----------------------------------|------------------------------|
| LPVPPPEPIPDYIVR          | 51,65 | 1798,00 | 16 | -0,4 | 9,70E+06 | A0A7R8V0P3 | Hypothetical protein           | structural constituent of cuticle |                              |
| LVPGLPSDKML              | 36,4  | 1378,79 | 13 | -1,2 | 5,46E+06 | A0A7R8UKG1 | Catalase                       | Enzyme                            | response to oxidative stress |
| LPVPPPPQIPDYIVR          | 51,95 | 1797,02 | 16 | -0,4 | 3,81E+07 | A0A7R8V147 | Hypothetical protein           | structural constituent of cuticle |                              |
| NFDKVIDFF                | 41,37 | 1143,56 | 9  | -0,6 | 3,35E+06 | A0A7R8UHR0 | Hypothetical protein           | Hemocyanin                        |                              |
| GAHLPVPPPEPIPDYIVR       | 64,38 | 2063,12 | 19 | -0,1 | 3,53E+08 | A0A7R8V0P3 | Hypothetical protein           | structural constituent of cuticle |                              |
| HLPVPPPEPIPDYIVR         | 50,84 | 1935,06 | 17 | -0,6 | 2,57E+08 | A0A7R8V0P3 | Hypothetical protein           | structural constituent of cuticle |                              |
| LVPGLPSDKMLQ             | 35,49 | 1506,85 | 14 | -0,3 | 1,27E+07 | A0A7R8UKG1 | Catalase                       | Enzyme                            | response to oxidative stress |
| GAHLPVPPPPQIPDYIVR       | 62,34 | 2062,14 | 19 | -0,4 | 7,79E+08 | A0A7R8V147 | Hypothetical protein           | structural constituent of cuticle |                              |
| GGPKGGPGGGPGGGPGGGPGPF   | 57,83 | 2028,94 | 25 | -3,2 | 2,62E+06 | A0A7R8UM91 | Hypothetical protein           | structural constituent of cuticle |                              |
| HLVPGILPSDKML            | 55,58 | 1515,85 | 14 | -0,3 | 3,96E+06 | A0A7R8UKG1 | Catalase                       | Enzyme                            | response to oxidative stress |
| AHLPVPPPEPIPDYIVR        | 49,6  | 2006,10 | 18 | -0,3 | 2,55E+06 | A0A7R8V0P3 | Hypothetical protein           | structural constituent of cuticle |                              |
| HLPVPPPPQIPDYIVR         | 49,3  | 1934,08 | 17 | -1,1 | 3,99E+08 | A0A7R8V147 | Hypothetical protein           | structural constituent of cuticle |                              |
| AHLPVPPPPQIPDYIVR        | 56,73 | 2005,11 | 18 | -0,9 | 3,55E+07 | A0A7R8V147 | Hypothetical protein           | structural constituent of cuticle |                              |
| GAHLPQPPPIPA             | 44,27 | 1193,66 | 12 | -1,2 | 3,24E+07 | A0A7R8YZ13 | Hypothetical protein           | structural constituent of cuticle |                              |
| YPGIADRM                 | 41,11 | 921,44  | 8  | -1   | 1,65E+07 | A0A087ZMI4 | Putative actin-related protein | Muscular                          |                              |
| GSGGGFGPGGGPGGPKGGPGGGPF | 64,02 | 1907,89 | 24 | -0,8 | 8,26E+06 | A0A7R8UM91 | Hypothetical protein           | structural constituent of cuticle |                              |
| KAIVAPGKGIL              | 36,04 | 1065,69 | 11 | -1,5 | 6,92E+06 | A0A7R8V4G4 | Fructose-bisphosphate aldolase | Enzyme                            |                              |
| DISDDRIGKM               | 27,2  | 1148,55 | 10 | -3,1 | 7,07E+05 | A0A7R8UHR0 | Hypothetical protein           | Hemocyanin                        |                              |
| GAHLPVPPPEPIPDYIV        | 56,93 | 1907,02 | 18 | -0,2 | 4,97E+06 | A0A7R8V0P3 | Hypothetical protein           | structural constituent of cuticle |                              |

|                             |       |         |    |      |          |            |                                |                                   |                              |
|-----------------------------|-------|---------|----|------|----------|------------|--------------------------------|-----------------------------------|------------------------------|
| GAHLPVPPPEPIPDYI            | 57,3  | 1807,95 | 17 | -1   | 2,45E+06 | A0A7R8V0P3 | Hypothetical protein           | structural constituent of cuticle |                              |
| HLVPGILSPDKMLQ              | 52,57 | 1643,91 | 15 | -0,8 | 1,78E+07 | A0A7R8UKG1 | Catalase                       | Enzyme                            | response to oxidative stress |
| GPGGPGGPGFGPGGPGGPGGKGGGPL  | 64,02 | 2038,00 | 26 | -1,4 | 4,77E+06 | A0A7R8UM91 | Hypothetical protein           | structural constituent of cuticle |                              |
| GFAGDDAPRA                  | 35,3  | 975,44  | 10 | -1,4 | 1,10E+06 | A0A087ZMI4 | Putative actin-related protein | Muscular                          |                              |
| GAHLPVPPPEPIPD              | 50,59 | 1531,80 | 15 | -1   | 2,28E+07 | A0A7R8V0P3 | Hypothetical protein           | structural constituent of cuticle |                              |
| GPGGPGGPKGPGGPGGPGGPGGPGGPF | 63,91 | 2290,09 | 30 | -1,7 | 3,91E+06 | A0A7R8UM91 | Hypothetical protein           | structural constituent of cuticle |                              |
| GAHLPVPPPPQIPDYI            | 59,52 | 1806,97 | 17 | -1,4 | 1,76E+07 | A0A7R8V147 | Hypothetical protein           | structural constituent of cuticle |                              |
| HLPVPPPEPIPDYIV             | 50,9  | 1778,96 | 16 | -1   | 1,43E+06 | A0A7R8V0P3 | Hypothetical protein           | structural constituent of cuticle |                              |
| GAHLPVPPPPQIPDYIV           | 58,97 | 1906,04 | 18 | -0,9 | 2,79E+07 | A0A7R8V147 | Hypothetical protein           | structural constituent of cuticle |                              |
| INLPDDQYRLG                 | 39,17 | 1302,66 | 11 | -1,1 | 2,04E+07 | A0A7R8URW5 | Hypothetical protein           | Muscular                          | Myosin complex               |
| IRDPILFPS                   | 30,44 | 1056,60 | 9  | -1,5 | 1,71E+07 | A0A7R8UKG1 | Catalase                       | Enzyme                            | response to oxidative stress |
| GFAGDDAPRAVFP               | 43,27 | 1405,66 | 14 | -0,6 | 1,07E+08 | A0A087ZMI4 | Putative actin-related protein | Muscular                          |                              |
| HLPVPPPPQIPDYI              | 54,12 | 1678,91 | 15 | -1,3 | 6,65E+06 | A0A7R8V147 | Hypothetical protein           | structural constituent of cuticle |                              |
| GAHLPVPPPEPIPDY             | 62,89 | 1694,87 | 16 | -0,8 | 1,81E+07 | A0A7R8V0P3 | Hypothetical protein           | structural constituent of cuticle |                              |
| GAHLPVPPPPQIPDY             | 60,46 | 1693,88 | 16 | -0,7 | 5,23E+07 | A0A7R8V147 | Hypothetical protein           | structural constituent of cuticle |                              |
| HLPVPPPEPIPDY               | 50,88 | 1566,81 | 14 | -1,3 | 8,93E+06 | A0A7R8V0P3 | Hypothetical protein           | structural constituent of cuticle |                              |
| GAHLPVPPPPQIPD              | 49,37 | 1530,82 | 15 | -1,4 | 4,23E+07 | A0A7R8V147 | Hypothetical protein           | structural constituent of cuticle |                              |
| HLPVPPPPQIPDYIV             | 53,83 | 1777,98 | 16 | -0,8 | 9,74E+06 | A0A7R8V147 | Hypothetical protein           | structural constituent of cuticle |                              |

|                         |       |         |    |      |          |            |                                  |                                   |                              |
|-------------------------|-------|---------|----|------|----------|------------|----------------------------------|-----------------------------------|------------------------------|
| HLPVPPPPQIPDY           | 56,42 | 1565,82 | 14 | 0,1  | 1,86E+07 | A0A7R8V147 | Hypothetical protein             | structural constituent of cuticle |                              |
| KAIVAPGKGILA            | 21,81 | 1136,73 | 12 | -2,2 | 5,34E+05 | A0A023EQM6 | Fructose-bisphosphate aldolase   | Enzyme                            |                              |
| AHLPVPPPPQIPDIYV        | 52,62 | 1849,01 | 17 | -1,9 | 6,77E+05 | A0A7R8V147 | Hypothetical protein             | structural constituent of cuticle |                              |
| HLPVPPPPQIPD            | 43,57 | 1402,76 | 13 | -0,5 | 2,71E+07 | A0A7R8V147 | Hypothetical protein             | structural constituent of cuticle |                              |
| PVDRPIPHV               | 34,25 | 1125,63 | 10 | -1,3 | 3,38E+07 | A0A7R8URU7 | Hypothetical protein             | nd                                |                              |
| GAHLPVPPPIPE            | 47,34 | 1222,67 | 12 | 0,2  | 2,38E+08 | A0A7R8V0P4 | Hypothetical protein             | structural constituent of cuticle |                              |
| QIPVDRPYPV              | 30,33 | 1182,64 | 10 | -0,5 | 1,98E+08 | A0A7R8URU7 | Hypothetical protein             | nd                                |                              |
| AGDDAPRAVFPS            | 40,34 | 1201,57 | 12 | -0,7 | 1,01E+08 | A0A087ZMI4 | Putative actin-related protein   | Muscular                          |                              |
| KALVAPGKGILA            | 21,81 | 1136,73 | 12 | -2,2 | 5,34E+05 | B4QW45     | Fructose-bisphosphate aldolase   | Enzyme                            |                              |
| AHLPVPPPPQIPDY          | 45,81 | 1636,86 | 15 | -1   | 1,89E+06 | A0A7R8V147 | Hypothetical protein             | structural constituent of cuticle |                              |
| IPVDRPYPV               | 32,91 | 1054,58 | 9  | -2   | 5,86E+07 | A0A7R8URU7 | Hypothetical protein             | nd                                |                              |
| INLPDDQYRL              | 29,61 | 1245,64 | 10 | -1,2 | 1,43E+07 | A0A7R8URW5 | Hypothetical protein             | Muscular                          | Myosin complex               |
| GAPGAPGAPGSPGRPGTGLPSIS | 66,4  | 2054,05 | 24 | -0,3 | 2,20E+07 | A0A7R8UM91 | Hypothetical protein             | structural constituent of cuticle |                              |
| PVPVDRPIPHV             | 28,35 | 1321,75 | 12 | -0,8 | 1,84E+08 | A0A7R8URU7 | Hypothetical protein             | nd                                |                              |
| QVPHVPVPVERVPVPV        | 29,37 | 1941,12 | 18 | -0,1 | 6,96E+06 | A0A7R8URU7 | Hypothetical protein             | nd                                |                              |
| GAHIPVPPPIPE            | 47,34 | 1222,67 | 12 | 0,2  | 2,38E+08 | A0A6J1S563 | arval cuticle protein 65Ag1-like | structural constituent of cuticle |                              |
| HLVPGILSPDKM            | 33,07 | 1402,76 | 13 | -2,8 | 2,71E+07 | A0A7R8UKG1 | Catalase                         | Enzyme                            | response to oxidative stress |
| GLDRVGTGW               | 22,33 | 959,48  | 9  | -0,9 | 5,47E+06 | A0A7R8UHR0 | Hypothetical protein             | Hemocyanin                        |                              |
| LPSLPSLSIKPVSPS         | 58,62 | 1617,93 | 16 | -1   | 1,57E+07 | A0A7R8UM91 | Hypothetical protein             | structural constituent of cuticle |                              |
| VPVDRPYPV               | 26,44 | 1040,57 | 9  | -1,2 | 1,16E+08 | A0A7R8URQ8 | Hypothetical protein             | enzyme                            | transferase activity         |
| QVPVDRPYPV              | 32,12 | 1168,62 | 10 | -0,5 | 2,31E+08 | A0A7R8URU7 | Hypothetical protein             | nd                                |                              |
| KSPFDPPDAPSQPE          | 36,04 | 1510,69 | 14 | -0,2 | 2,17E+06 | A0A7R8Z362 | Hypothetical protein             | ATP binding                       |                              |
| IPVPVDRPIPHV            | 49,64 | 1434,83 | 13 | -1,8 | 2,74E+07 | A0A7R8URU7 | Hypothetical protein             | nd                                |                              |

|                              |       |         |    |      |          |            |                           |                                   |                      |
|------------------------------|-------|---------|----|------|----------|------------|---------------------------|-----------------------------------|----------------------|
| GAHLPPPPVPE                  | 43,27 | 1208,66 | 12 | -0,2 | 3,73E+08 | A0A7R8V1D0 | Hypothetical protein      | structural constituent of cuticle |                      |
| YINLPDDQYRLG                 | 42,59 | 1465,72 | 12 | 0,3  | 4,94E+06 | A0A7R8URW5 | Hypothetical protein      | Muscular                          | Myosin complex       |
| NIPVPVDRPIHPV                | 43,15 | 1548,88 | 14 | -1   | 2,31E+08 | A0A7R8URU7 | Hypothetical protein      | nd                                |                      |
| GPPGPPGPPGPPGPPGKFLDKPYKPVFE | 40,61 | 2919,53 | 29 | -1,3 | 1,74E+07 | A0A7R8UM91 | Hypothetical protein      | structural constituent of cuticle |                      |
| DAILPPTRPTEKPL               | 28,74 | 1546,87 | 14 | -5,1 | 9,59E+06 | B6ZCL2     | Elongation factor 1 alpha | RNA binding                       |                      |
| KVPVPQYPYV                   | 25,45 | 1122,64 | 10 | -0,8 | 1,14E+07 | A0A7R8URU7 | Hypothetical protein      | nd                                |                      |
| KEELPGKPF                    | 39,06 | 1043,57 | 9  | -1,4 | 8,66E+07 | A0A7R8V147 | Hypothetical protein      | structural constituent of cuticle |                      |
| SLPINPPPKNTIDDIPIAN          | 49,08 | 1915,01 | 18 | -0,3 | 7,39E+06 | A0A7R8YKR5 | Hypothetical protein      | Enzyme                            | proteolysis          |
| SGKFPTSRPSIGLPGSPGLPGL       | 33,8  | 2180,18 | 22 | 1,1  | 2,39E+06 | A0A7R8UM91 | Hypothetical protein      | structural constituent of cuticle |                      |
| GPVKVLPDEPRVL                | 44,84 | 1417,83 | 13 | -1,2 | 6,44E+06 | A0A7R8YT79 | Hypothetical protein      | Enzyme                            | esterase             |
| HVPVDRPYPV                   | 22,13 | 1177,62 | 10 | -0,9 | 2,25E+07 | A0A7R8URQ8 | Hypothetical protein      | enzyme                            | transferase activity |
| IPVDRPYPVKVPVPQYPYVE         | 58,28 | 2288,26 | 20 | -0,3 | 9,61E+06 | A0A7R8URU7 | Hypothetical protein      | nd                                |                      |
| SVVPVPQYPYVE                 | 40,72 | 1210,62 | 11 | -0,5 | 5,63E+07 | A0A7R8URU7 | Hypothetical protein      | nd                                |                      |
| QVPHPVVPVVERPVVPYVE          | 47,38 | 2070,16 | 19 | -0,9 | 4,01E+08 | A0A7R8URU7 | Hypothetical protein      | nd                                |                      |
| NRYPYVPVPSV                  | 36,94 | 1320,72 | 12 | -1,3 | 9,43E+06 | A0A7R8URU7 | Hypothetical protein      | nd                                |                      |
| QIPVDRPYPVKVPVPQYPYVE        | 45,72 | 2416,32 | 21 | -0,8 | 4,04E+07 | A0A7R8URU7 | Hypothetical protein      | nd                                |                      |
| GGVRPNIPVIKLE                | 31,31 | 1487,88 | 14 | -0,8 | 8,46E+06 | A0A7R8UM91 | Hypothetical protein      | structural constituent of cuticle |                      |
| DDLLPGVK                     | 33,65 | 968,55  | 9  | -0,9 | 2,97E+07 | A0A7R8UJC0 | Hypothetical protein      | Hemocyanin                        |                      |
| TPSLSPGSPGFPGRPGTPGDGSGSY    | 51,28 | 2428,13 | 26 | -2,7 | 6,89E+06 | A0A7R8UM91 | Hypothetical protein      | structural constituent of cuticle |                      |
| KVPVPQYPYVER                 | 23,97 | 1407,79 | 12 | -1   | 9,64E+06 | A0A7R8URU7 | Hypothetical protein      | nd                                |                      |
| VNRYPYVPV                    | 28,65 | 1039,58 | 9  | -0,7 | 5,92E+07 | A0A7R8URQ8 | Hypothetical protein      | enzyme                            | transferase activity |
| AVNRYPYVPV                   | 38,09 | 1110,62 | 10 | -0,7 | 9,67E+07 | A0A7R8URQ8 | Hypothetical protein      | enzyme                            | transferase activity |
| VPVAQYPYVER                  | 36,19 | 1253,68 | 11 | -1,1 | 6,74E+06 | A0A7R8URU7 | Hypothetical protein      | nd                                |                      |
| GDYVPKTPDYIIR                | 45,68 | 1535,80 | 13 | -1   | 6,24E+07 | A0A7R8YSD0 | Hypothetical protein      | structural constituent of cuticle |                      |
| GYPIRIPVGAE                  | 40,95 | 1170,64 | 11 | -1,2 | 6,66E+06 | A0A310SDR1 | ATP synthase subunit beta | Enzyme                            | transporter activity |

|                                  |       |         |    |      |          |            |                          |                                   |                      |
|----------------------------------|-------|---------|----|------|----------|------------|--------------------------|-----------------------------------|----------------------|
| VPVPQYPVE                        | 39,85 | 1123,59 | 10 | -1,4 | 7,36E+07 | A0A7R8URU7 | Hypothetical protein     | nd                                |                      |
| DIDYDYDYK                        | 33,65 | 1208,49 | 9  | -1,1 | 1,08E+07 | A0A7R8UJC0 | Hypothetical protein     | Hemocyanin                        |                      |
| RNIPVPVDRPIHPV                   | 43,66 | 1704,98 | 15 | -1,2 | 6,44E+07 | A0A7R8URU7 | Hypothetical protein     | nd                                |                      |
| GVGIPVPVQR                       | 30,92 | 1020,61 | 10 | -1,4 | 1,59E+08 | A0A7R8URU7 | Hypothetical protein     | nd                                |                      |
| TPSLSPGSPGFPRPGTPGDGSGS          | 56,83 | 2265,07 | 25 | -0,5 | 6,20E+06 | A0A7R8UM91 | Hypothetical protein     | structural constituent of cuticle |                      |
| QVPHPVVPVE                       | 31,91 | 1196,66 | 11 | 0,8  | 7,21E+07 | A0A7R8URU7 | Hypothetical protein     | nd                                |                      |
| VPVDRPVVPVERPVV                  | 37,2  | 1850,08 | 17 | -0,4 | 2,58E+07 | A0A7R8URQ8 | Hypothetical protein     | enzyme                            | transferase activity |
| SVNRPYPVPVSPV                    | 44,75 | 1506,82 | 14 | -0,3 | 3,69E+08 | A0A7R8URU7 | Hypothetical protein     | nd                                |                      |
| PVDRPVVPVERPVV                   | 30,05 | 1751,01 | 16 | -1,3 | 3,18E+06 | A0A7R8URQ8 | Hypothetical protein     | enzyme                            | transferase activity |
| GSHIPVAPPVE                      | 50,74 | 1198,63 | 12 | -1,7 | 9,21E+07 | A0A7R8UKB6 | Hypothetical protein     | structural constituent of cuticle |                      |
| SKYTDDINIM                       | 40,51 | 1198,55 | 10 | -0,1 | 1,40E+07 | A0A7R8UJC0 | Hypothetical protein     | Hemocyanin                        |                      |
| VPVDRPVVPVERPVP                  | 26,65 | 1751,01 | 16 | -1,3 | 1,80E+06 | A0A7R8URQ8 | Hypothetical protein     | enzyme                            | transferase activity |
| GSRKGVNLPGVPVDLPAVS              | 45,82 | 1861,04 | 19 | -1,6 | 1,15E+06 | A0A2Z5REH8 | Pyruvate kinase          | Enzyme                            | transferase activity |
| KVPVPQYPVE                       | 36,65 | 1251,69 | 11 | -1   | 3,30E+08 | A0A7R8URU7 | Hypothetical protein     | nd                                |                      |
| GPVKVLPDEPRV                     | 27,58 | 1304,75 | 12 | 1,1  | 1,70E+05 | A0A7R8YT79 | Hypothetical protein     | Enzyme                            | esterase             |
| VDRPVVPIRE                       | 30,97 | 1275,73 | 11 | -0,8 | 1,40E+07 | A0A7R8URQ8 | Hypothetical protein     | enzyme                            | transferase activity |
| RQVPYPVHV                        | 22,6  | 1093,60 | 9  | -1,5 | 1,41E+06 | A0A7R8URU7 | Hypothetical protein     | nd                                |                      |
| VNRPYPVPVSPV                     | 39,56 | 1419,79 | 13 | -2,1 | 1,00E+08 | A0A7R8URU7 | Hypothetical protein     | nd                                |                      |
| AVNRPYPVPVN                      | 28,73 | 1224,66 | 11 | -0,6 | 4,62E+06 | A0A7R8URQ8 | Hypothetical protein     | enzyme                            | transferase activity |
| VPVDRPVVPVERVPY                  | 41,12 | 1914,07 | 17 | -0,8 | 3,90E+07 | B0WR94     | Hypothetical protein     | nd                                |                      |
| PVDRPVVPVERVPY                   | 38,63 | 1815,00 | 16 | 0,1  | 6,53E+06 | B0WR94     | Hypothetical protein     | nd                                |                      |
| INLPDDQYR                        | 20,84 | 1132,55 | 9  | -0,8 | 4,56E+06 | A0A7R8URW5 | Hypothetical protein     | Muscular                          | Myosin complex       |
| GGPGGPGGPGGPGGPGKPGSPFGPGGSPFGPG | 48,19 | 2919,37 | 37 | -1,6 | 9,73E+05 | A0A7R8UM91 | Hypothetical protein     | structural constituent of cuticle |                      |
| VPVAQYPVE                        | 31,55 | 1097,58 | 10 | -1,1 | 4,62E+07 | A0A7R8URU7 | Hypothetical protein     | nd                                |                      |
| VPVPQIPITVDRPVV                  | 46,62 | 1611,93 | 15 | -0,6 | 6,83E+06 | A0A7R8URQ8 | Hypothetical protein     | enzyme                            | transferase activity |
| KRPYPVHVVPVDRPYPV                | 27,08 | 2017,13 | 17 | -2,1 | 3,49E+07 | A0A0L7LRD1 | Putative cuticle protein | structural constituent of cuticle |                      |
| SVDRPVVPVERPVV                   | 51,77 | 1740,99 | 16 | -1,2 | 4,46E+08 | A0A7R8URU7 | Hypothetical protein     | nd                                |                      |
| RKVPYPVHVVPVDRPYPV               | 46,21 | 2017,13 | 17 | -0,4 | 1,59E+08 | A0A7R8URQ8 | Hypothetical protein     | enzyme                            | transferase activity |

|                         |       |         |    |      |          |            |                                |                     |                      |
|-------------------------|-------|---------|----|------|----------|------------|--------------------------------|---------------------|----------------------|
| VHVPAPYPVE              | 34,18 | 1106,58 | 10 | -0,7 | 5,36E+07 | A0A7R8URU7 | Hypothetical protein           | nd                  |                      |
| RQVPVPVQIPVDRPYPV       | 50,72 | 1958,11 | 17 | -0,6 | 7,03E+07 | A0A7R8URU7 | Hypothetical protein           | nd                  |                      |
| VQRNIPVPVDRPIHPV        | 22,56 | 1932,11 | 17 | -2,3 | 2,47E+06 | A0A7R8URU7 | Hypothetical protein           | nd                  |                      |
| NVPVDRPVVPVVERPVVPV     | 39,31 | 1964,12 | 18 | -0,8 | 7,69E+06 | A0A7R8URQ8 | Hypothetical protein           | enzyme              | transferase activity |
| SVGVD RPVPVPV           | 35,08 | 1219,69 | 12 | -0,2 | 1,56E+08 | A0A7R8URU7 | Hypothetical protein           | nd                  |                      |
| VDRPVVPVVERPVVPV        | 30,62 | 1653,96 | 15 | -0,5 | 7,56E+07 | A0A7R8URQ8 | Hypothetical protein           | enzyme              | transferase activity |
| RKVPYPVHVPVDRPVVPV      | 42,58 | 1953,13 | 17 | -2,9 | 2,57E+08 | A0A7R8URQ8 | Hypothetical protein           | enzyme              | transferase activity |
| QVNVVPVDRPVVPVVERPVVPV  | 34,61 | 2191,25 | 20 | -1,3 | 9,65E+07 | A0A7R8URQ8 | Hypothetical protein           | enzyme              | transferase activity |
| KSYELPDGQVITIG          | 40,23 | 1518,79 | 14 | -1,1 | 9,63E+06 | A0A087ZMI4 | Putative actin-related protein | Muscular            |                      |
| LIVIDIPRIT              | 20,06 | 1151,73 | 10 | -1,8 | 4,73E+06 | A0A7R8YVB4 | Hypothetical protein           | calcium ion binding |                      |
| VPVDRPVVPVVERPVVPVQ     | 29,23 | 1978,14 | 18 | -1,2 | 1,41E+07 | A0A7R8URQ8 | Hypothetical protein           | enzyme              | transferase activity |
| AVNRYPVPVNVDRPVVPVE     | 53,34 | 2312,26 | 21 | -0,6 | 8,38E+06 | A0A7R8URQ8 | Hypothetical protein           | enzyme              | transferase activity |
| VDRPVVPVQVPVDRPYPV      | 43,99 | 1931,06 | 17 | -4,1 | 3,94E+06 | A0A7R8URU7 | Hypothetical protein           | nd                  |                      |
| QVNVVPVDRPVVPVVERPVVPVQ | 40,05 | 2319,31 | 21 | -1,6 | 5,26E+07 | A0A7R8URQ8 | Hypothetical protein           | enzyme              | transferase activity |
| AVNRPVVPVSVVPVPQPY      | 61,53 | 1914,07 | 18 | 0    | 4,24E+06 | A0A7R8URQ8 | Hypothetical protein           | enzyme              | transferase activity |
| KVPVAQPYPVE             | 45,25 | 1225,67 | 11 | -1,5 | 9,60E+07 | A0A7R8URU7 | Hypothetical protein           | nd                  |                      |
| RVAPEEHPVLL             | 37,08 | 1258,70 | 11 | -2   | 1,62E+07 | A0A087ZMI4 | Putative actin-related protein | Muscular            |                      |
| AVHVPAPYPVE             | 41,95 | 1177,61 | 11 | -1,3 | 5,16E+07 | A0A7R8URU7 | Hypothetical protein           | nd                  |                      |
| VNRPVVPVPV              | 25,82 | 975,59  | 9  | -0,3 | 3,67E+07 | A0A7R8URQ8 | Hypothetical protein           | enzyme              | transferase activity |
| KDPFTPSRPGAPEPS         | 48,9  | 1682,83 | 16 | -4,1 | 4,78E+05 | A0A7R8Z362 | Hypothetical protein           | ATP binding         |                      |
| VPVQVPVPQPY             | 32,57 | 1221,68 | 11 | -1,7 | 3,72E+07 | A0A7R8URQ8 | Hypothetical protein           | enzyme              | transferase activity |
| VGVD RPVPVPV            | 26,13 | 1132,66 | 11 | -1,9 | 1,62E+07 | A0A7R8URU7 | Hypothetical protein           | nd                  |                      |
| NVPVPQPITVDRPVVPV       | 44,32 | 1725,98 | 16 | -1,3 | 1,59E+06 | A0A7R8URQ8 | Hypothetical protein           | enzyme              | transferase activity |
| ELIVIDIPRIT             | 39,84 | 1280,77 | 11 | -2,7 | 6,54E+06 | A0A7R8YVB4 | Hypothetical protein           | calcium ion binding |                      |
| SVGVD RPVPVPVAY         | 35,28 | 1453,79 | 14 | -0,4 | 2,06E+07 | A0A7R8URU7 | Hypothetical protein           | nd                  |                      |
| QVNVVPVDRPVVPVPV        | 37,49 | 1513,86 | 14 | -0,6 | 4,09E+06 | A0A7R8URQ8 | Hypothetical protein           | enzyme              | transferase activity |
| VNVVPVDRPVVPVVERPVVPV   | 43,71 | 2063,19 | 19 | -0,9 | 7,03E+07 | A0A7R8URQ8 | Hypothetical protein           | enzyme              | transferase activity |
| KSYELPDGQ               | 23,07 | 1035,49 | 9  | -2,1 | 1,93E+07 | A0A087ZMI4 | Putative actin-related protein | Muscular            |                      |
| SVGVD RPVPVPVA          | 36,81 | 1290,73 | 13 | -0,5 | 4,34E+07 | A0A7R8URU7 | Hypothetical protein           | nd                  |                      |
| SVDRPVVPVVERPVVPS       | 32,72 | 1828,13 | 17 | -1   | 1,97E+06 | A0A7R8URU7 | Hypothetical protein           | nd                  |                      |



|                           |       |         |    |      |          |            |                                |             |                      |
|---------------------------|-------|---------|----|------|----------|------------|--------------------------------|-------------|----------------------|
| HVKVPVPQYPYV              | 41,57 | 1358,77 | 12 | -1,2 | 4,66E+06 | A0A7R8URU7 | Hypothetical protein           | nd          |                      |
| NVPVDRPVPVPVERPVPVQ       | 52,48 | 2092,18 | 19 | -1,6 | 5,07E+06 | A0A7R8URQ8 | Hypothetical protein           | enzyme      | transferase activity |
| RVPVPVDNPNVPVPY           | 57,09 | 1546,85 | 14 | -0,3 | 1,61E+08 | A0A7R8URQ8 | Hypothetical protein           | enzyme      | transferase activity |
| KSYELPDGQVITI             | 20,37 | 1461,77 | 13 | -1,4 | 5,85E+06 | A0A087ZMI4 | Putative actin-related protein | Muscular    |                      |
| QVPVQVPVPQPY              | 39,53 | 1349,73 | 12 | -0,7 | 6,77E+07 | A0A7R8URQ8 | Hypothetical protein           | enzyme      | transferase activity |
| VPVDRPVPVPVE              | 41,47 | 1301,73 | 12 | -2   | 2,05E+07 | A0A7R8URQ8 | Hypothetical protein           | enzyme      | transferase activity |
| QVPVKVPVPQPY              | 26,95 | 1349,77 | 12 | -0,3 | 9,76E+07 | A0A7R8URQ8 | Hypothetical protein           | enzyme      | transferase activity |
| VPVKVPVPQPY               | 27,95 | 1221,71 | 11 | -0,7 | 2,53E+07 | A0A7R8URQ8 | Hypothetical protein           | enzyme      | transferase activity |
| AVPVKVPVAQYPVE            | 24,92 | 1591,90 | 15 | -1,1 | 1,34E+06 | A0A7R8URU7 | Hypothetical protein           | nd          |                      |
| NVDRPVPVPV                | 21,13 | 1090,61 | 10 | -1,4 | 1,35E+07 | A0A7R8URQ8 | Hypothetical protein           | enzyme      | transferase activity |
| QVNVVPQPITVDRPVPV         | 57,33 | 1953,10 | 18 | -4,1 | 1,22E+06 | A0A7R8URQ8 | Hypothetical protein           | enzyme      | transferase activity |
| VKVPVPQYPVE               | 31,46 | 1350,75 | 12 | -1,6 | 1,95E+07 | A0A7R8URU7 | Hypothetical protein           | nd          |                      |
| VDRPVPVQVPHVPVPVERPVPVPVE | 46,21 | 2832,60 | 26 | -1,1 | 1,88E+07 | A0A7R8URU7 | Hypothetical protein           | nd          |                      |
| IAVPVKVPVAQYPVE           | 54,06 | 1704,98 | 16 | 0,7  | 6,08E+06 | A0A7R8URU7 | Hypothetical protein           | nd          |                      |
| IVKVPVHIPAPYPVE           | 46,47 | 1656,96 | 15 | -0,6 | 1,71E+06 | A0A7R8UR83 | Hypothetical protein           | nd          |                      |
| VDRPVPVQVPVQVPVPQPY       | 51,59 | 2112,17 | 19 | -0,8 | 4,18E+06 | A0A7R8URQ8 | Hypothetical protein           | enzyme      | transferase activity |
| VDRPVPVQVPHVPVPVERPVPVPV  | 51,49 | 2703,56 | 25 | -1,4 | 3,15E+06 | A0A7R8URU7 | Hypothetical protein           | nd          |                      |
| VDRPVPVQVPHVPVPVE         | 51,53 | 1959,09 | 18 | -4,6 | 3,47E+06 | A0A7R8URU7 | Hypothetical protein           | nd          |                      |
| VNVVPVQPITVDRPVPV         | 46,37 | 1825,05 | 17 | -0,9 | 4,29E+06 | A0A7R8URQ8 | Hypothetical protein           | enzyme      | transferase activity |
| NRVPVPVDNPNVPVPY          | 63,56 | 1660,89 | 15 | 0,5  | 4,86E+08 | A0A7R8URQ8 | Hypothetical protein           | enzyme      | transferase activity |
| VNVVPDRPVPVPVERPVPVQ      | 47,03 | 2191,25 | 20 | -3,7 | 6,91E+07 | A0A7R8URQ8 | Hypothetical protein           | enzyme      | transferase activity |
| AIPVPVKQIE                | 23,12 | 1092,65 | 10 | -1,5 | 2,80E+07 | A0A7R8URU7 | Hypothetical protein           | nd          |                      |
| VPVKVPVAQYPVE             | 43,81 | 1520,86 | 14 | -0,4 | 6,87E+06 | A0A7R8URU7 | Hypothetical protein           | nd          |                      |
| HVKVPVPQYPVE              | 53,02 | 1487,81 | 13 | -0,7 | 8,46E+07 | A0A7R8URU7 | Hypothetical protein           | nd          |                      |
| VDRPVPVPVE                | 29,85 | 1105,61 | 10 | -2,3 | 7,02E+07 | A0A7R8URQ8 | Hypothetical protein           | enzyme      | transferase activity |
| SVDRPVPVPVE               | 37,3  | 1192,65 | 11 | 0    | 7,69E+07 | A0A7R8URU7 | Hypothetical protein           | nd          |                      |
| QVNVVPDRPVPVPVERPVPVQV    | 27,13 | 2401,35 | 22 | -0,4 | 2,60E+06 | A0A7R8URQ8 | Hypothetical protein           | enzyme      | transferase activity |
| TVDRPVPVPIRE              | 39,69 | 1376,78 | 12 | 0,4  | 1,23E+08 | A0A7R8URQ8 | Hypothetical protein           | enzyme      | transferase activity |
| GIGTVPVGRVE               | 35,51 | 1082,61 | 11 | -1   | 1,45E+07 | B6ZCL2     | Elongation factor 1 alpha      | RNA binding |                      |

|                      |       |         |    |      |          |            |                      |            |                      |
|----------------------|-------|---------|----|------|----------|------------|----------------------|------------|----------------------|
| QVNVVDRPVVPVPE       | 38,16 | 1642,90 | 15 | -0,8 | 5,37E+07 | A0A7R8URQ8 | Hypothetical protein | enzyme     | transferase activity |
| VQVPVKVPVPQPY        | 39,2  | 1448,84 | 13 | -0,8 | 1,13E+08 | A0A7R8URQ8 | Hypothetical protein | enzyme     | transferase activity |
| VDRPVVPVEN           | 41,74 | 1219,66 | 11 | -1   | 1,57E+07 | A0A7R8URQ8 | Hypothetical protein | enzyme     | transferase activity |
| ENRVVPVVDNPVPVPY     | 58,39 | 1789,94 | 16 | -1,5 | 9,93E+06 | A0A7R8URQ8 | Hypothetical protein | enzyme     | transferase activity |
| DKKDYISY             | 26,11 | 1030,50 | 8  | -1,2 | 4,83E+06 | A0A7R8UJC0 | Hypothetical protein | Hemocyanin |                      |
| VPVERPVVPVPE         | 47,3  | 1315,75 | 12 | -1   | 1,28E+07 | A0A7R8URU7 | Hypothetical protein | nd         |                      |
| TVDRPVVPVI           | 29,34 | 1091,63 | 10 | -0,8 | 3,80E+07 | A0A7R8URQ8 | Hypothetical protein | enzyme     | transferase activity |
| VNVVPVDRPVVPVPE      | 51,25 | 1514,85 | 14 | -0,5 | 6,08E+07 | A0A7R8URQ8 | Hypothetical protein | enzyme     | transferase activity |
| NVDRPVVPVPE          | 42,84 | 1219,66 | 11 | -1   | 1,71E+08 | A0A7R8URQ8 | Hypothetical protein | enzyme     | transferase activity |
| NVDRPVVPVEN          | 51,79 | 1333,70 | 12 | -1   | 5,05E+07 | A0A7R8URQ8 | Hypothetical protein | enzyme     | transferase activity |
| VPVNVDRPVVPVPE       | 50,73 | 1514,85 | 14 | -0,5 | 6,08E+07 | A0A7R8URQ8 | Hypothetical protein | enzyme     | transferase activity |
| RAIPVPVKQIE          | 42,11 | 1248,76 | 11 | -1,1 | 5,91E+07 | A0A7R8URU7 | Hypothetical protein | nd         |                      |
| VPVNVDRPVVPVEN       | 56,93 | 1628,89 | 15 | 0,7  | 1,19E+06 | A0A7R8URQ8 | Hypothetical protein | enzyme     | transferase activity |
| TVDRPVVPQVPVQVPVPQPY | 60,69 | 2213,22 | 20 | -1,4 | 6,85E+07 | A0A7R8URQ8 | Hypothetical protein | enzyme     | transferase activity |
| TVQVPVKVPVPQPY       | 57,08 | 1549,89 | 14 | -0,4 | 8,92E+07 | A0A7R8URQ8 | Hypothetical protein | enzyme     | transferase activity |
| RTVQVPVKVPVPQPY      | 54,37 | 1705,99 | 15 | -0,4 | 2,15E+08 | A0A7R8URQ8 | Hypothetical protein | enzyme     | transferase activity |
| RAIPVPVKQIEQV        | 39,49 | 1475,88 | 13 | -0,4 | 6,71E+06 | A0A7R8URU7 | Hypothetical protein | nd         |                      |
| TVDRPVVPV            | 23,72 | 881,50  | 8  | -1,6 | 2,28E+07 | A0A7R8URQ8 | Hypothetical protein | enzyme     | transferase activity |
| RQVPVPVTVQ           | 38,44 | 1121,66 | 10 | -0,5 | 9,57E+07 | A0A7R8URU7 | Hypothetical protein | nd         |                      |
| RTVQVPVKVPVPQ        | 41,32 | 1427,86 | 13 | -0,1 | 2,59E+07 | A0A7R8URQ8 | Hypothetical protein | enzyme     | transferase activity |

(B)

| Peptide              | -<br>10lgP | Mass          | Length | ppm  | Area<br>Sample | Accession      | Protein              | Function                          | Sub-function |
|----------------------|------------|---------------|--------|------|----------------|----------------|----------------------|-----------------------------------|--------------|
| GPPGPPGPPGPPGPPGKFPL | 62,26      | 1815,967      | 20     | -0,3 | 2,74E+06       | A0A7R8UM9<br>1 | Hypothetical protein | structural constituent of cuticle |              |
| GPGGGPGGKGGGGPGGPF   | 53,65      | 1445,705<br>1 | 18     | -3,8 | 2,46E+06       | A0A7R8UM9<br>1 | Hypothetical protein | structural constituent of cuticle |              |
| GPPGPPGPPGLPGKFPGST  | 67,28      | 1712,888<br>5 | 19     | -0,7 | 4,40E+06       | A0A7R8UM9<br>1 | Hypothetical protein | structural constituent of cuticle |              |
| GPGGGPGGKGGKGGGPL    | 58         | 1314,668      | 17     | -1,8 | 2,39E+06       | A0A7R8UM9<br>1 | Hypothetical protein | structural constituent of cuticle |              |
| SRPSIGLPGSPGLPL      | 44,76      | 1503,840<br>8 | 16     | 0,1  | 5,51E+06       | A0A7R8UM9<br>1 | Hypothetical protein | structural constituent of cuticle |              |

|                              |       |               |    |      |          |                |                                |                                   |                              |
|------------------------------|-------|---------------|----|------|----------|----------------|--------------------------------|-----------------------------------|------------------------------|
| GAPGAPGSPGRPGSPIRPS          | 42,22 | 1713,891      | 19 | -0,6 | 4,59E+06 | A0A7R8UM9<br>1 | Hypothetical protein           | structural constituent of cuticle |                              |
| LPVPPPPQIPDIYVR              | 52,88 | 1797,018<br>8 | 16 | -0,9 | 7,16E+07 | A0A7R8V147     | Hypothetical protein           | structural constituent of cuticle |                              |
| GAPGAPGAPGSPGRPGTGPLS        | 52,32 | 1853,938<br>4 | 22 | -0,1 | 3,47E+05 | A0A7R8UM9<br>1 | Hypothetical protein           | structural constituent of cuticle |                              |
| HLPVPPPPQIPDIYVR             | 53,82 | 1934,077<br>8 | 17 | -0,6 | 3,31E+08 | A0A7R8V147     | Hypothetical protein           | structural constituent of cuticle |                              |
| AHLPVPPPPQIPDIYVR            | 60,43 | 2005,114<br>9 | 18 | -1,5 | 4,47E+07 | A0A7R8V147     | Hypothetical protein           | structural constituent of cuticle |                              |
| ASDPDYSIR                    | 30,25 | 1022,466<br>9 | 9  | -1   | 2,32E+06 | A0A067RLP1     | Catalase                       | Enzyme                            | response to oxidative stress |
| GPGGPGGPGFPGGPGGPGGKPGGPL    | 63,58 | 2038,002      | 26 | -0,6 | 3,07E+06 | A0A7R8UM9<br>1 | Hypothetical protein           | structural constituent of cuticle |                              |
| GFAGDDAPRA                   | 39,38 | 975,441       | 10 | -0,7 | 7,35E+06 | A0A087ZMI4     | Putative actin-related protein | Muscular                          |                              |
| GAHLPVPPPEPIPD               | 50,79 | 1531,803<br>5 | 15 | -2   | 2,60E+07 | A0A7R8V0P3     | Hypothetical protein           | structural constituent of cuticle |                              |
| GPGGPGGPKPGGPGGPGGPGGPGGPGGF | 52,45 | 2290,087<br>9 | 30 | 0,1  | 2,27E+06 | A0A7R8UM9<br>1 | Hypothetical protein           | structural constituent of cuticle |                              |
| HLPVPPPEPIPD                 | 53,59 | 1403,744<br>9 | 13 | -0,7 | 1,06E+07 | A0A7R8V0P3     | Hypothetical protein           | structural constituent of cuticle |                              |
| KGGPGGPGGPGGPGGPGGPGGPGPF    | 59,26 | 2028,944<br>1 | 25 | -0,7 | 1,65E+06 | A0A7R8UM9<br>1 | Hypothetical protein           | structural constituent of cuticle |                              |
| GAHLPVPPPEPIPDY              | 66,39 | 1694,866<br>7 | 16 | -1,5 | 4,33E+06 | A0A7R8V0P3     | Hypothetical protein           | structural constituent of cuticle |                              |
| GAHLPVPPPPQIPDY              | 64,13 | 1693,882<br>7 | 16 | -2   | 1,28E+07 | A0A7R8V147     | Hypothetical protein           | structural constituent of cuticle |                              |
| GAHLPVPPPPQIPD               | 47,06 | 1530,819<br>3 | 15 | -3,8 | 5,53E+07 | A0A7R8V147     | Hypothetical protein           | structural constituent of cuticle |                              |
| HLPVPPPPQIPDY                | 45,68 | 1565,824<br>1 | 14 | -0,8 | 3,07E+06 | A0A7R8V147     | Hypothetical protein           | structural constituent of cuticle |                              |
| GLPGKFPPSRPSGSPGLPGL         | 52,12 | 2014,099<br>9 | 21 | -1,5 | 3,47E+05 | A0A7R8UM9<br>1 | Hypothetical protein           | structural constituent of cuticle |                              |
| HLPVPPPPQIPD                 | 46,47 | 1402,760<br>9 | 13 | -0,5 | 2,60E+07 | A0A7R8V147     | Hypothetical protein           | structural constituent of cuticle |                              |
| PVDRPIPHV                    | 32,09 | 1125,629<br>4 | 10 | -1,3 | 2,16E+07 | A0A7R8URU7     | Hypothetical protein           | nd                                |                              |
| GAHLPVPPPIPE                 | 42,29 | 1222,670<br>9 | 12 | -1,1 | 1,63E+08 | A0A7R8V0Q1     | Hypothetical protein           | structural constituent of cuticle |                              |
| QIPVDRPYPV                   | 24,38 | 1182,639<br>6 | 10 | -1,7 | 3,05E+07 | A0A7R8URU7     | Hypothetical protein           | nd                                |                              |
| IPVDRPYPV                    | 30,72 | 1054,581<br>1 | 9  | -0,6 | 1,04E+08 | A0A7R8URU7     | Hypothetical protein           | nd                                |                              |
| AHLPVPPPPQIPD                | 39,82 | 1473,798      | 14 | -1   | 4,04E+06 | A0A7R8V147     | Hypothetical protein           | structural constituent of cuticle |                              |
| GAPGAPGAPGSPGRPGTGPLSIS      | 70,93 | 2054,054<br>4 | 24 | -1,5 | 1,99E+07 | A0A7R8UM9<br>1 | Hypothetical protein           | structural constituent of cuticle |                              |

|                          |       |               |    |      |          |                |                                   |                                   |                      |
|--------------------------|-------|---------------|----|------|----------|----------------|-----------------------------------|-----------------------------------|----------------------|
| PVPVDRPIPHV              | 26,98 | 1321,750<br>6 | 12 | -0,8 | 1,60E+08 | A0A7R8URU7     | Hypothetical protein              | nd                                |                      |
| QVPHVPVPVERPVPVPV        | 59,86 | 1924,093<br>4 | 18 | -1   | 1,07E+07 | A0A7R8URU7     | Hypothetical protein              | nd                                |                      |
| GAHIPVPPPIE              | 42,29 | 1222,670<br>9 | 12 | -1,1 | 1,63E+08 | A0A6J1S563     | larval cuticle protein 65Ag1-like | structural constituent of cuticle |                      |
| LPSLPSLSIKPVSPS          | 55,29 | 1617,934<br>1 | 16 | -1,1 | 3,01E+06 | A0A7R8UM9<br>1 | Hypothetical protein              | structural constituent of cuticle |                      |
| VPVDRPYPV                | 27,62 | 1040,565<br>4 | 9  | -0,8 | 2,60E+08 | A0A7R8URQ8     | Hypothetical protein              | enzyme                            | transferase activity |
| TPDYIR                   | 41,15 | 876,4705      | 7  | 0,1  | 9,61E+06 | A0A7R8YSD0     | Hypothetical protein              | structural constituent of cuticle |                      |
| EELPGKPF                 | 22,1  | 915,4702      | 8  | 0,4  | 3,27E+07 | A0A7R8V147     | Hypothetical protein              | structural constituent of cuticle |                      |
| IPVPVDRPIPHV             | 48,57 | 1434,834<br>7 | 13 | -0,6 | 3,33E+07 | A0A7R8URU7     | Hypothetical protein              | nd                                |                      |
| GAHLVPPPVPE              | 44,27 | 1208,655<br>3 | 12 | -1,5 | 3,38E+08 | A0A7R8V1D0     | Hypothetical protein              | structural constituent of cuticle |                      |
| NIPVPVDRPIPHV            | 38,9  | 1531,851<br>1 | 14 | -0,4 | 2,04E+08 | A0A7R8URU7     | Hypothetical protein              | nd                                |                      |
| VPVPQPYPVER              | 24,78 | 1279,692<br>4 | 11 | -0,3 | 9,84E+06 | A0A7R8URU7     | Hypothetical protein              | nd                                |                      |
| KEELPGKPF                | 43,99 | 1043,565<br>1 | 9  | -1,2 | 2,50E+07 | A0A7R8V147     | Hypothetical protein              | structural constituent of cuticle |                      |
| SVPVPQPYPVE              | 40,44 | 1210,623<br>3 | 11 | -1,8 | 5,41E+07 | A0A7R8URU7     | Hypothetical protein              | nd                                |                      |
| QVPHVPVPVERPVPVPVE       | 55,63 | 2053,136      | 19 | -1,6 | 9,40E+08 | A0A7R8URU7     | Hypothetical protein              | nd                                |                      |
| TPSLSPGSPGFGRPGTPGDGSGSY | 52,7  | 2428,129<br>4 | 26 | 0    | 4,03E+06 | A0A7R8UM9<br>1 | Hypothetical protein              | structural constituent of cuticle |                      |
| VNRPYVPV                 | 21,4  | 1039,581<br>4 | 9  | -0,7 | 4,14E+07 | A0A7R8URQ8     | Hypothetical protein              | enzyme                            | transferase activity |
| AVNRPYVPV                | 30,36 | 1110,618<br>5 | 10 | -1,6 | 7,19E+07 | A0A7R8URQ8     | Hypothetical protein              | enzyme                            | transferase activity |
| GDYVPKTPDYIR             | 49,91 | 1535,798<br>3 | 13 | -1   | 4,22E+07 | A0A7R8YSD0     | Hypothetical protein              | structural constituent of cuticle |                      |
| VPVPQPYPVE               | 36,04 | 1123,591<br>3 | 10 | -1,4 | 9,35E+07 | A0A7R8URU7     | Hypothetical protein              | nd                                |                      |
| RNIPVPVDRPIPHV           | 46,59 | 1704,978<br>8 | 15 | -0,4 | 3,81E+07 | A0A7R8URU7     | Hypothetical protein              | nd                                |                      |
| GVGIPVPVQR               | 30,28 | 1020,608      | 10 | -1,2 | 1,42E+08 | A0A7R8URU7     | Hypothetical protein              | nd                                |                      |
| IIAPPERKY                | 28,39 | 1085,623<br>3 | 9  | -0,2 | 5,57E+07 | A0A087ZMI4     | Putative actin-related protein    | Muscular                          |                      |
| QRNIPVPVDRPIPHV          | 58,56 | 1816,010<br>7 | 16 | 0,5  | 2,72E+06 | A0A7R8URU7     | Hypothetical protein              | nd                                |                      |
| VPVDRPVPVPVERPVPV        | 32,65 | 1850,077<br>8 | 17 | -1,5 | 2,86E+07 | A0A7R8URQ8     | Hypothetical protein              | enzyme                            | transferase activity |

|                     |       |               |    |      |          |            |                      |                                   |                      |
|---------------------|-------|---------------|----|------|----------|------------|----------------------|-----------------------------------|----------------------|
| SVNRPYPVPVPSPV      | 44,33 | 1506,819<br>5 | 14 | -1   | 3,18E+08 | A0A7R8URU7 | Hypothetical protein | nd                                |                      |
| PVDRPVVPVVERPVV     | 29,23 | 1751,009<br>3 | 16 | -1,9 | 9,74E+06 | A0A7R8URQ8 | Hypothetical protein | enzyme                            | transferase activity |
| GSHIPVAPPVPE        | 45,27 | 1198,634<br>5 | 12 | -1,7 | 1,11E+08 | A0A7R8UKB6 | Hypothetical protein | structural constituent of cuticle |                      |
| VDRPVVPIRE          | 33,3  | 1275,729<br>9 | 11 | -1,2 | 2,93E+07 | A0A7R8URQ8 | Hypothetical protein | enzyme                            | transferase activity |
| VNRPYPVPVPSPV       | 39,3  | 1419,787<br>4 | 13 | -0,8 | 6,50E+07 | A0A7R8URU7 | Hypothetical protein | nd                                |                      |
| VPVDRPVVPVVERPV     | 34,97 | 1653,956<br>5 | 15 | -1,2 | 7,62E+07 | A0A7R8URQ8 | Hypothetical protein | enzyme                            | transferase activity |
| VPVAQYPVPE          | 32,45 | 1097,575<br>7 | 10 | -1   | 1,98E+07 | A0A7R8URU7 | Hypothetical protein | nd                                |                      |
| VNRPYPVPVN          | 28,66 | 1153,624<br>4 | 10 | -2,1 | 1,28E+07 | A0A7R8URQ8 | Hypothetical protein | enzyme                            | transferase activity |
| SVDRPVVPVVERPVV     | 42,56 | 1740,988<br>5 | 16 | -0,5 | 5,45E+08 | A0A7R8URU7 | Hypothetical protein | nd                                |                      |
| VHVPAPYPVE          | 40,76 | 1106,576      | 10 | -0,7 | 4,36E+07 | A0A7R8URU7 | Hypothetical protein | nd                                |                      |
| NVPVDRPVVPVVERPVV   | 41,21 | 1964,120<br>6 | 18 | -0,9 | 6,08E+06 | A0A7R8URQ8 | Hypothetical protein | enzyme                            | transferase activity |
| SVGDRPVVPV          | 34,27 | 1219,692<br>4 | 12 | -0,1 | 1,39E+08 | A0A7R8URU7 | Hypothetical protein | nd                                |                      |
| VDRPVVPVVERPVV      | 27,85 | 1653,956<br>5 | 15 | -1,2 | 7,62E+07 | A0A7R8URQ8 | Hypothetical protein | enzyme                            | transferase activity |
| VPVDRPVVPVVERPVVQ   | 44,07 | 1978,136<br>4 | 18 | -0,1 | 1,74E+07 | A0A7R8URQ8 | Hypothetical protein | enzyme                            | transferase activity |
| QVNVVDRPVVPVVERPVVQ | 49,02 | 2302,279<br>8 | 21 | -0,2 | 1,14E+08 | A0A7R8URQ8 | Hypothetical protein | enzyme                            | transferase activity |
| KVPVAQYPVPE         | 43,62 | 1225,670<br>7 | 11 | -0,3 | 1,48E+08 | A0A7R8URU7 | Hypothetical protein | nd                                |                      |
| AVNRPVPVPV          | 23,42 | 1046,623<br>7 | 10 | -1   | 1,14E+08 | A0A7R8URQ8 | Hypothetical protein | enzyme                            | transferase activity |
| VNRPVPVPV           | 21,23 | 975,5865      | 9  | -1,4 | 6,70E+07 | A0A7R8URQ8 | Hypothetical protein | enzyme                            | transferase activity |
| VGVDRPVVPV          | 29,1  | 1132,660<br>4 | 11 | -0,3 | 3,93E+07 | A0A7R8URU7 | Hypothetical protein | nd                                |                      |
| DRPVVPVPE           | 21,23 | 1006,544<br>7 | 9  | -1,5 | 1,00E+04 | A0A7R8URQ8 | Hypothetical protein | enzyme                            | transferase activity |
| VNVPVDRPVVPVVERPVV  | 47    | 2063,189      | 19 | -0,8 | 6,73E+07 | A0A7R8URQ8 | Hypothetical protein | enzyme                            | transferase activity |
| SVGDRPVVPVPA        | 38,87 | 1290,729<br>5 | 13 | -0,5 | 4,45E+07 | A0A7R8URU7 | Hypothetical protein | nd                                |                      |
| NVPVDRPVVPVVERPVVQ  | 49,33 | 2092,179<br>2 | 19 | -1,6 | 3,77E+06 | A0A7R8URQ8 | Hypothetical protein | enzyme                            | transferase activity |
| RVPVPVDNPVPVY       | 60,06 | 1546,850<br>7 | 14 | -0,3 | 1,96E+08 | A0A7R8URQ8 | Hypothetical protein | enzyme                            | transferase activity |

|                      |       |               |    |      |          |            |                      |            |                      |
|----------------------|-------|---------------|----|------|----------|------------|----------------------|------------|----------------------|
| VPVDRPVVPVE          | 31,15 | 1301,734<br>3 | 12 | -0,8 | 8,51E+06 | A0A7R8URQ8 | Hypothetical protein | enzyme     | transferase activity |
| VPVDRPVVPVQ          | 39,81 | 1104,629<br>2 | 10 | -0,4 | 3,34E+07 | A0A7R8URQ8 | Hypothetical protein | enzyme     | transferase activity |
| VPVKVPVPQPY          | 28,9  | 1221,712<br>2 | 11 | -0,7 | 3,16E+07 | A0A7R8URQ8 | Hypothetical protein | enzyme     | transferase activity |
| HVPVDRPVVPVQ         | 38,88 | 1241,688      | 11 | -0,1 | 4,23E+07 | A0A7R8URQ8 | Hypothetical protein | enzyme     | transferase activity |
| NRVPVPVDNPVPVPY      | 65,2  | 1660,893<br>7 | 15 | -0,2 | 2,69E+08 | A0A7R8URQ8 | Hypothetical protein | enzyme     | transferase activity |
| VDQPQKVIR            | 42,04 | 1180,692<br>7 | 10 | -1,5 | 8,82E+06 | A0A7R8UHR0 | Hypothetical protein | Hemocyanin |                      |
| VNVVPDRPVVPVERPVVPVQ | 47,22 | 2191,247<br>6 | 20 | -3,4 | 4,85E+07 | A0A7R8URQ8 | Hypothetical protein | enzyme     | transferase activity |
| VPVKVPVAQPYPVE       | 41,95 | 1520,860<br>2 | 14 | -0,6 | 1,23E+07 | A0A7R8URU7 | Hypothetical protein | nd         |                      |
| HVKVPVPQYPVE         | 53,2  | 1487,813<br>6 | 13 | -0,8 | 8,02E+07 | A0A7R8URU7 | Hypothetical protein | nd         |                      |
| VDRPVVPVE            | 20,64 | 1105,613<br>2 | 10 | -1,1 | 4,46E+07 | A0A7R8URQ8 | Hypothetical protein | enzyme     | transferase activity |
| SVDRPVVPVE           | 32,2  | 1192,645<br>1 | 11 | -1   | 3,20E+07 | A0A7R8URU7 | Hypothetical protein | nd         |                      |
| TVDRPVVPPIRE         | 33,03 | 1376,777<br>6 | 12 | 0,5  | 1,37E+08 | A0A7R8URQ8 | Hypothetical protein | enzyme     | transferase activity |
| QVNVVPDRPVVPVE       | 27,59 | 1625,877<br>7 | 15 | 0,2  | 7,28E+06 | A0A7R8URQ8 | Hypothetical protein | enzyme     | transferase activity |
| VQVPVKVPVPQPY        | 37,96 | 1448,839<br>1 | 13 | -1,8 | 9,69E+07 | A0A7R8URQ8 | Hypothetical protein | enzyme     | transferase activity |
| VDRPVVPVEN           | 40,8  | 1219,656      | 11 | 0,3  | 2,43E+07 | A0A7R8URQ8 | Hypothetical protein | enzyme     | transferase activity |
| RAIPVPVKQ            | 28,1  | 1006,628<br>7 | 9  | -0,9 | 1,01E+07 | A0A7R8URU7 | Hypothetical protein | nd         |                      |
| DKKDYISY             | 32,33 | 1030,497<br>1 | 8  | -1,1 | 4,73E+07 | A0A7R8UJC0 | Hypothetical protein | Hemocyanin |                      |
| VPVERPVVPVE          | 37,74 | 1315,749<br>9 | 12 | -2,1 | 3,03E+06 | A0A7R8URU7 | Hypothetical protein | nd         |                      |
| VNVVPDRPVVPVE        | 48,55 | 1514,845<br>6 | 14 | -0,3 | 3,51E+07 | A0A7R8URQ8 | Hypothetical protein | enzyme     | transferase activity |
| NVDRPVVPVE           | 48,72 | 1219,656      | 11 | -1   | 1,27E+08 | A0A7R8URQ8 | Hypothetical protein | enzyme     | transferase activity |
| NVDRPVVPVEN          | 55,37 | 1333,699      | 12 | -0,8 | 6,04E+07 | A0A7R8URQ8 | Hypothetical protein | enzyme     | transferase activity |
| TVQVPVKVPVPQPY       | 55,67 | 1549,886<br>7 | 14 | -0,3 | 7,25E+07 | A0A7R8URQ8 | Hypothetical protein | enzyme     | transferase activity |
| RTVQVPVKVPVPQPY      | 53,38 | 1705,987<br>9 | 15 | -0,9 | 1,40E+08 | A0A7R8URQ8 | Hypothetical protein | enzyme     | transferase activity |
| TVDRPVVPV            | 31,08 | 881,4971      | 8  | 0    | 1,64E+08 | A0A7R8URQ8 | Hypothetical protein | enzyme     | transferase activity |
